# Supplementary material
Source: PubMed Central journal article supplement (PMC6517124)
Supplement: supp_7.2.E316_2018-0128-original-submission.pdf [file supp_7.2.E316_2018-0128-original-submission.pdf]

# HEALTH PROFILES OF FIRST NATIONS CHILDREN LIVING ON- RESERVE IN NORTHERN ONTARIO

## *Authors:*

Mary Jo Wabano, MHK<sup>1</sup>; Leslie McGregor, BA<sup>2</sup>; Roger Beaudin, BA<sup>3</sup>; Diane Jacko<sup>1</sup>, BA;  
Lorrilee McGregor, PhD<sup>2</sup>; Sabine Kristensen-Didur, BA<sup>3</sup>; Debbie Mishibinijima, BA<sup>1</sup>; Koyo  
Usuba, MHK<sup>4</sup>; Nancy L. Young, PhD<sup>4</sup>

- 1 Naandwechige Gamig Wikwemikong Health Centre, Wiikwemkoong Unceded Territory, ON
- 2 Whitefish River First Nation, ON
- 3 M'Chigeeng First Nation, ON
- 4 Laurentian University, Sudbury ON

Corresponding Author: Dr. Nancy L Young, [nyoung@laurentian.ca](mailto:nyoung@laurentian.ca)

## **Acknowledgements:**

We are extremely grateful to the members of the Wiikwemkoong community who have contributed to this project over several years, by offering their experience, insights and critical guidance. These include: Mrs. Rita Corbiere and others. We would like to express thanks to the children and communities for their support of this project.

## **Funding information:**

Funding for this study was provided by a Health Systems Research Fund grant from the Ontario Ministry of Health and Long Term Care.

1  
2  
3  
4  
5  
6  
7  
8  
9  
10  
11  
12  
13  
14  
15  
16  
17  
18  
19  
20  
21  
22  
23  
24  
25  
26  
27  
28  
29  
30  
31  
32  
33  
34  
35  
36  
37  
38  
39  
40  
41  
42  
43  
44  
45  
46  
47  
48  
49  
50  
51  
52  
53  
54  
55  
56  
57  
58  
59  
60

**Compliance with Ethical Standards:**

This research was conducted with ethical approval, and community approval. All children and parents provided full and informed consent. Two authors on this paper hold copyright of the ACHWM which is shared at no cost.

Confidential

## ABSTRACT

### BACKGROUND:

The Aboriginal Children's Health and Well-Being Measure (ACHWM<sup>®</sup>) was developed to enable Aboriginal health leaders to gather information on the health of their children. This paper provides health profiles for First Nation children's, living on traditional territory, based on self-report.

### METHODS:

The ACHWM was implemented in three First Nations with the informed consent of children and their parents. The ACHWM was completed by children on Android tablets to enhance the feasibility, and sustainability of the assessment. The data were analysed to describe the distribution of health summary and quadrant scores from the pooled sample.

### RESULTS:

A total of 196 participants, between 7.6 and 21.7 years of age, completed the ACHWM. Overall, 40% rated their health as excellent or very good. ACHWM summary scores ranged from 39.8 to 98.7 with a mean of 74.1 (95% Confidence Interval [CI] 72.5-75.7). Strengths were reported in the spiritual (mean=78.7; CI 76.7-80.8), physical (mean=77.1; CI 75.1-79.0) and emotional (mean=74.4; CI 72.5-76.3) quadrants. The greatest opportunity for improvement was in the mental (cognition) quadrant (mean=61.6; CI 56.9-63.4). Quadrant scores demonstrated good balance for 44% of participants. The screening process indicated that 16.8% of participating children were in need of further health support and the local mental health workers connected them to services within their home communities.

1  
2  
3  
4  
5  
6  
7  
8  
9  
10  
11  
12  
13  
14  
15  
16  
17  
18  
19  
20  
21  
22  
23  
24  
25  
26  
27  
28  
29  
30  
31  
32  
33  
34  
35  
36  
37  
38  
39  
40  
41  
42  
43  
44  
45  
46  
47  
48  
49  
50  
51  
52  
53  
54  
55  
56  
57  
58  
59  
60

**INTERPRETATION:**

This paper presents initial estimates for child health based on self-report from a large sample of First Nations children, that are important to establish benchmarks for future research and for comparison in other communities and contexts.

**KEY WORDS:**

Aboriginal, Children, Health, Questionnaire, Benchmarking

**WORD COUNT:**

2,495

Confidential

## INTRODUCTION

Evidence-based health care is considered a gold standard for clinical practice, policy, and planning<sup>1,2</sup> but is not yet an option for many Aboriginal<sup>1</sup> communities in Canada. Three authors on this paper are First Nations Health Directors, and are responsible for local programming, and require local health data that extends beyond the bio-medical. From their perspectives, the most meaningful data reflect First Nations models of health and are relevant to Aboriginal cultures and contexts. Decision makers who are responsible for Aboriginal children's health are challenged when searching for relevant health statistics, because most available statistics are based on illness [e.g., rates of diabetes<sup>3,4</sup>] rather than wellness. When health data are presented, the results are typically aggregated at the provincial or national levels<sup>5</sup>. As a result, there is a critical absence of health data that is relevant at the local level<sup>6-8</sup>. While national and provincial data are helpful to identify problems, this information is far less helpful in identifying solutions.

There have been several calls for solution-focused action to promote health among Aboriginal children in Canada<sup>9-12</sup>. Since each Aboriginal population is distinct (culturally, politically, and geographically), the assumption that decisions can be made based on provincial or national estimates is inherently flawed. Community-specific data or data aggregated at the local level is essential in tailoring health services to provide cost-effective, high-impact programs and services that are needed to solve critical challenges in Aboriginal child health.

The Aboriginal Children's Health and Well-being Measure or ACHWM<sup>®</sup> was developed to provide First Nation communities and Aboriginal agencies a tool to gather local data

---

<sup>1</sup> Note: the term Aboriginal is used in this paper, rather than Indigenous, based on guidance from the participating First Nations advisory committee.

© The copyright for the ACHWM is held by Mary Jo Wabano, Nancy L. Young and Stephen Ritchie. It is shared with Aboriginal communities and agencies free of charge; registration is required.

1  
2  
3<sup>13</sup>Throughout the development a key goal was to ensure our implementation model was feasible,  
4 sustainable, and would inform local health planning decisions. Our process evolved through a  
5 community-university collaboration<sup>13</sup>, guided by a Medicine Wheel framework<sup>14</sup>. This measure  
6 has been thoroughly tested with First Nations children in Wiikwemkoong, as well as with Métis  
7 and Inuit children in urban contexts<sup>15</sup>. The results have demonstrated the validity<sup>16</sup> and  
8 reliability<sup>17</sup> of the self-reported ACHWM for children 8 to 18 years of age, when completed  
9 using Android tablets.  
10  
11  
12  
13  
14  
15  
16  
17  
18

19 The aim of this paper is to share the aggregated ACHWM results to generate local evidence and  
20 inform health planning at the local level.  
21  
22  
23  
24

## 25 **METHODS**

### 26 **Setting and design**

27  
28  
29 A population-level cross-sectional survey was conducted between August of 2013 and March of  
30 2015 in the Manitoulin Island region of Northern Ontario. The participating communities were:  
31 Wiikwemkoong Unceded Territory (August 2013 to August 2014); M'Chigeeng First Nation  
32 (October to November 2014); and Whitefish River First Nation (December 2014 to March 2015)  
33 (see Figure 1). Eligible participants, between the ages of 8 and 18 years, were recruited at a  
34 variety of locations: schools, the local health centre, and community events.  
35  
36  
37  
38  
39  
40  
41  
42  
43  
44  
45

46 [Insert Figure 3 approximately here]  
47  
48

49 The primary outcome measures in this study were a Global Health Rating (GHR) and the  
50 ACHWM. Children were asked to complete the ACHWM independently on android tablets with  
51 a text-to-speech option that enabled those with low literacy levels to participate.  
52  
53  
54  
55  
56  
57  
58  
59  
60

1  
2  
3 Data gathered through the surveys were uploaded to a secure server, REDCap (Research  
4 Electronic Data Capture)<sup>19</sup>, hosted at Laurentian University. The ACHWM has a summary  
5 score and four quadrant scores. Each score ranges from 0 to 100, where higher score indicates  
6 better health and well-being. At the time of the survey implementation, a 58-item version was  
7 the standard, however, to aid interpretation and comparison for future research, the scores were  
8 calculated based on the current 62-item version with the additional four items as missing data.  
9  
10 The ACHWM also contains a series of questions within it that have been identified by local  
11 mental health workers as important in screening for potential health risks among Aboriginal  
12 Children. As part of our implementation process, the research team ensured that a local mental  
13 health worker was available at the implementation sites. All children with concerning responses  
14 met with a local mental health worker for a brief assessment as part of the implementation  
15 process. Referrals to appropriate services were made the same day for all children in need of  
16 further support. This step is considered a best practice when implementing a health survey with  
17 vulnerable children, respects the children's voices, and ensures their safety. Informed consent  
18 was obtained from all participating children, and their parents when applicable.

### 39 **Statistical analyses:**

40  
41 The data from all communities was pooled to produce an aggregate picture of child health and to  
42 ensure cell sizes were sufficient to protect the confidentiality of participants. The first responses  
43 of the survey were used for participants who completed the ACHWM on more than one  
44 occasion. Means, standard deviations (SD) and 95% confidence intervals (CI) were computed  
45 for the ACHWM Summary Score and the ACHWM quadrant scores: spiritual, emotional,  
46 physical, and mental health. Box plots were produced to show the distribution of scores visually.  
47  
48  
49  
50  
51  
52  
53  
54  
55  
56  
57  
58  
59  
60

1  
2  
3 The concept of *balance* is particularly important in the Anishinaabek conceptualization of health.  
4  
5 According to traditional teachings, balance is reflected when all aspects of health and wellness  
6  
7 are equally strong. However, these teachings also recognize that the goal is not to achieve  
8  
9 perfect balance at all points in time, but to move towards better balance. To describe the degree  
10  
11 of balance in this large sample, we computed a balance score for each individual using the  
12  
13 within-person variability method, previously described by Tractenberg and Pietrzak<sup>20</sup>. The  
14  
15 balance score used in this paper is the within-person standard deviation of the quadrant scores.  
16  
17 We recognize that is it not the traditional way of assessing balance, but are using it as a marker  
18  
19 or indicator of balance. On this balance scale, lower numbers indicate optimal balance. Based  
20  
21 on discussions within our team, we believe a score of 10 or less represents good balance.  
22  
23  
24  
25

26  
27 Linear regression analysis was used to explore the effects of age on the summary score, each of  
28  
29 the quadrant scores, and the balance score. Finally, we computed the proportion of participants  
30  
31 who were identified as being in need of a further emotional health support based on the screening  
32  
33 process, as a guide to other communities who are preparing to implement the ACHWM. All  
34  
35 analyses were performed using Stata version 14 (Stata Statistics/Data Analysis, Stata Corp LP,  
36  
37 College Station, TX).  
38  
39  
40

### 41 **Ethics approval**

42  
43 This study was approved by the Research Ethics Board (REB) at Laurentian University and the  
44  
45 Manitoulin Anishinabek Research Review Committee (MARRC)<sup>18</sup>. To respect community  
46  
47 protocols, a Band Council Motion (BCM) was approved in Wiikwemkoong in the spring of 2013  
48  
49 (BCM #418-2013), in Whitefish River in October 2013 (BCM #10-27-13), and in M'Chigeeng  
50  
51 in July 2014 (BCM #44.13).  
52  
53  
54  
55  
56  
57  
58  
59  
60



## RESULTS

A total of 196 First Nations children participated in the survey: 124 in Wiikwemkoong, 32 in M'Chigeeng and 40 in Whitefish River. They ranged in age from 7.6 to 21.7 years, with a mean of 13.6 (SD=3.69) years. Some participants were over 18 years of age, however they were in school, thus they were included in the analysis. This is in keeping with a First Nations perspective on youth, which extends up to 25 years of age.

### Aggregate Results

The GHRs in this sample were: 16% excellent; 24% very good; 44% good; 11% fair; and 5% poor health. The ACHWM summary scores ranged from 39.8 to 98.7 with an average of 74.1 (SD=11.45; CI 72.5 – 75.7), on a scale with a maximum range from 0 (worst) to 100 (best), as is shown in Figure 2. This distribution was slightly skewed (-0.68) but was not kurtotic (3.38). Based on these parameters, parametric statistics were considered to be appropriate.

[Insert Figure 2 approximately here]

The strengths, as reported from the perspective of these children, were in their spiritual, physical and emotional quadrants, with mean scores of 78.7 (SD=14.51; CI 76.7 - 80.8), 77.1 (SD=13.90; CI 75.1 - 79.0) and 74.4 (SD=13.62; CI 72.5 - 76.3) respectively. The greatest opportunity for improvement was in the mental health quadrant, with a mean of 61.6 (SD=12.61; CI 56.9 - 63.4). Note that the mental quadrant reflects the children's assessments of their thinking and problem solving (i.e., intellectual health or cognition), whereas the emotional quadrant reflects what western society considers to be "mental health". The distribution of the summary score and quadrant scores are shown in Figure 3.

[Insert Figure 3 approximately here]

## Sub-Analyses

Scores were explored by age, and older children were found to report slightly lower ACHWM summary scores; decreasing by 0.7 points per year of age (CI 0.26 - 1.13,  $p=0.002$ ). This slight age effect was apparent across all 4 quadrant scores, with a decrease of: 1.1 point (CI 0.53 - 1.61) per year of age for spiritual; 0.66 (CI 0.13 - 1.18) for physical; 0.54 (CI 0.02 - 1.06) for emotional; and 0.49 points (CI 0.12 - 0.97) for mental health.

When we explored the balance within each participant, using the standard deviation of the 4 quadrant scores, we observed balance scores that ranged from 1 to 24, with a mean of 11.0 (SD=4.69; CI 10.3 - 11.7) and a median of 10.6. Note that a cut point of 10 points or lower was identified *a priori* to indicate good balance, and based on this definition, 44% of our sample had good balance. The distribution of balance scores is shown in Figure 4. There was no apparent variation in balance scores related to age or gender.

[Insert Figure 4 approximately here]

In addition to the main focus of understanding the health of First Nation children, the ACHWM also afforded the opportunity to screen for mental health concerns. The screening process allowed us to identify 33 children (16.8% of participants) who were in need of further assessment, and enabled the mental health workers to connect them to ongoing supports within their home communities.

## INTERPRETATION

The results presented in this paper provide a health profile from a relatively large sample of First Nation children living on their traditional territories in rural Northern Ontario. The mean

1  
2  
3 ACHWM summary score in this sample was 79 and the mean quadrant scores were: spiritual 79;  
4  
5 emotional 74; physical 77; and mental 62. Thus these children were strong spiritually and their  
6  
7 greatest opportunity was in the mental health quadrant. According to the guidance of the  
8  
9 Medicine Wheel, the mental quadrant focuses on thinking, reasoning and problem solving and  
10  
11 could also be considered as an intellectual or cognition domain.  
12  
13

14  
15 It is difficult to put the ACHWM scores into context, since there is limited health data from  
16  
17 Aboriginal children reported in the literature. From the global health ratings in this sample, we  
18  
19 know that 16% of our study population (and 14% of our sample of youth 12 to 17 years) reported  
20  
21 excellent health. This is much lower than the 22.8% of First Nations youth (12 to 17 years) in  
22  
23 Ontario who self-reported “excellent” health on the Regional Health Survey (RHS)<sup>4</sup>. Thus, the  
24  
25 results reported here are significantly different from the Ontario RHS results; underscoring the  
26  
27 importance of local data for planning purposes.  
28  
29

30  
31 It is also possible to consider the scores reported here in comparison to what we know based on  
32  
33 normative data from the PedsQL, which is a generic health-related quality of life measure for  
34  
35 children. The interpretation of ACHWM scores were previously established in relation to the  
36  
37 PedsQL, because we know that the ACHWM scale is similar to the PedsQL scale ( $r=0.51$  with  
38  
39 0.3 points difference in the PedsQL vs. ACHWM summary scores)<sup>21</sup>. We also know that the  
40  
41 mean PedsQL score for an urban school-based population sample was 80.6 (SD=13.3)<sup>22</sup>.  
42  
43

44  
45 Furthermore, Varni’s initial validation study of the PedsQL reported a mean Total PedsQL score  
46  
47 of 79.6 (SD=15.3) in a sample of 960 children 5 to 18 years of age<sup>23</sup>. This suggests that rural  
48  
49 First Nations children, from the Manitoulin region have health scores that approach PedsQL  
50  
51 norms. However, there are also many children (16.8% of participants) who have been identified  
52  
53  
54  
55  
56  
57  
58  
59  
60

1  
2  
3 as needing new mental health services through this study. Thus, additional health and social  
4 supports are needed to address these apparent health in-equities.  
5  
6  
7

8 This paper adds important new information regarding the relationship between self-reported  
9 health scores and age in Aboriginal children. Our exploratory analyses suggest that the impact of  
10 age is linear and small (reduction of 0.7 points per year of age). Furthermore, our findings  
11 suggest the impact extends to all aspects of health and well-being. To our knowledge, one  
12 publication has reported on the relationship between health scores and age among Aboriginal  
13 children, and reported that emotional and behavioral problems were more common (23%) in  
14 older children (>12 years of age) compared to younger children (18%)<sup>24</sup>. The inclusion of  
15 balance scores in this manuscript represents a unique contribution to the literature. We applied  
16 an innovative statistical approach to estimate the Anishinaabek construct of balance. This is the  
17 first time this construct has been quantified. We were able to statistically analyse the balance  
18 scores to identify 44% of the sample with good balance and substantial variability in balance  
19 scores between individuals. This analysis may present another way of looking at an individual  
20 child's self-reported health. Our results in this section suggest that it is typical for some degree  
21 of imbalance across the quadrant scores within each child and that striving for balance is an  
22 ongoing exercise.  
23  
24  
25  
26  
27  
28  
29  
30  
31  
32  
33  
34  
35  
36  
37  
38  
39  
40  
41  
42

### 43 **Limitations**

44  
45  
46 This research has several limitations. First, our sample comprised approximately 25% of the  
47 children in each of three communities, and may be considered a sample of convenience. As  
48 such, scores may be slightly elevated. Secondly, the data is from three rural First Nations in  
49 close proximity to each other, thus has produced a local estimate. Thirdly, our definition of good  
50 balance requires further exploration. Finally, the sample did not include Inuit or Métis children.  
51  
52  
53  
54  
55  
56  
57  
58  
59  
60

1  
2  
3 Despite these limitations, we are confident that these results add substantially to what we know  
4 about Aboriginal children's health. We are eager to see results from other populations, and  
5  
6 examine how they compare to these profiles.  
7  
8  
9

### 10 **Conclusion and future direction**

11  
12  
13 The ACHWM is a new, culturally-relevant patient reported outcome measure that should be  
14 considered as a potential population health assessment tool for Aboriginal communities. The  
15  
16 profiles reported here provide an initial estimate to understand how First Nations children living  
17  
18 on their traditional territory in Northern Ontario perceive their health. These initial profiles  
19  
20 establish benchmarks, against which these communities may assess changes over time, and may  
21  
22 also represent a benchmark to which other communities may compare their profiles. The  
23  
24 information presented in this paper may form part of the resources that are needed to support  
25  
26 program evaluation within Aboriginal communities, enable communities to learn from one  
27  
28 another, and promote the creation of new knowledge that is relevant to Aboriginal communities.  
29  
30  
31 In doing so, these communities may identify best practices that may contribute to better child  
32  
33 health in the future.  
34  
35  
36  
37  
38  
39  
40  
41  
42  
43  
44  
45  
46  
47  
48  
49  
50  
51  
52  
53  
54  
55  
56  
57  
58  
59  
60

## REFERENCES

1. Sackett DL, Rosenberg WMC, Gray JAM, Haynes RB, Richardson WS. Evidence Based Medicine: What It Is and What It Isn't. *British Medical Journal* 1996;312:71-2.
2. Adams J, Broom A, editors. *Evidence-Based Healthcare in Context: Critical Social Science Perspectives*. New York: Routledge Taylor & Frances; 2016.
3. MacMillan HL, Walsh CA, Jamieson E, Wong MYY, Faries EJ, McCue H et al. The Health of Ontario First Nations People: Results from the Ontario First Nations Regional Health Survey. *Canadian Journal of Public Health / Revue Canadienne de Sante Publique* 2003;94(3):168-72.
4. Chiefs of Ontario. *First Nations Regional Health Survey (RHS) Ontario Region Phase 2 (2008/10): People's Report*. Toronto, Ontario; 2014 December 2014. Available from: URL: <http://data.fnigc.ca/online>.
5. Guèvremont A, Carriere G, Bougie E, Kohen D. Acute care hospitalization of Aboriginal children and youth. *Health Reports* 2017;28(7):11-7.
6. Population Health Assessment LDCP Team. *Children Count. Assessing Child and Youth Surveillance Gaps for Ontario Public Health Units*. Windsor, ON: Public Health Ontario; 2017 February 2017.
7. Smylie J, Anderson M. Understanding the Health of Indigenous Peoples in Canada: Key Methodological and Conceptual Challenges. *Canadian Medical Association Journal* 2006;175(6):602-5.

- 1  
2  
3 8. Smylie J, Adomako P. Indigenous Children's Health Report: Health Assessment in Action.  
4  
5 Toronto, Ontario: St. Michael's Hospital, Keenan Research Institute; 2009.  
6  
7
- 8  
9 9. Ball J. Promoting Equity and Dignity for Aboriginal Children in Canada. Institute for  
10  
11 Research on Public Policy (IRPP) Choices 2008;14(7):1-32.  
12
- 13 10. Canadian UNICEF Committee. Canadian Supplement to the State of the World's Children.  
14  
15 Aboriginal Children's Health: Leaving No Child Behind 2009 May 12, 2010]. Available  
16  
17 from: URL:  
18  
19  
20 [www.unicef.ca/sites/default/files/.../Leaving%20no%20child%20behind%2009.pdf](http://www.unicef.ca/sites/default/files/.../Leaving%20no%20child%20behind%2009.pdf).  
21  
22
- 23 11. Provincial Advocate for Children & Youth. Together We Are ... Feathers of Hope: A First  
24  
25 Nations Youth Action Plan. Toronto: Office of the Provincial Advocate for Children and  
26  
27 Youth; 2014 May 2014.  
28  
29
- 30 12. TRC. Honouring the Truth, Reconciling for the Future. Summary of the Final Report of  
31  
32 the Truth and Reconciliation Commission of Canada. Winnipeg, Manitoba: Truth and  
33  
34 Reconciliation Commission of Canada; 2015 December 2015 Report No.: ISBN 978-0-660-  
35  
36 02078-5. Available from: URL: [www.trc.ca](http://www.trc.ca).  
37  
38  
39
- 40 13. Young NL, Wabano MJ, Burke TA, Ritchie SD, Mishibinijima D, Corbiere RG. A Process  
41  
42 for Creating the Aboriginal Children's Health and Well-Being Measure (ACHWM).  
43  
44 Canadian Journal of Public Health 2013;104(2):e136-e41.  
45  
46
- 47 14. Dumont J. First Nations regional longitudinal health survey (RHS) cultural framework.  
48  
49 Ottawa (ON): RHS; 2005.  
50  
51  
52  
53  
54  
55  
56  
57  
58  
59  
60

- 1  
2  
3 15. Young NL, Jacko D, Wabano MJ, Hawthorne L, Seabrook S, Wabanosse S et al. A  
4  
5 Screening Mechanism to Recognize and Support Aboriginal Children At-Risk: based on a  
6  
7 child-centric survey. Canadian Journal of Public Health 2016;107(4-5):e399-e403.  
8  
9
- 10  
11 16. Young NL, Wabano MJ, Usuba K, Pangowish B, Trottier M, Jacko D et al. Validity of the  
12  
13 Aboriginal Children's Health and Well-Being Measure: Aaniish Naa Gegii? Health and  
14  
15 Quality of Life Outcomes 2015;13(1):148-56.  
16  
17
- 18 17. Young NL, Wabano MJ, Usuba K, Mishibinijima D, Jacko D, Burke TA. Reliability of the  
19  
20 Aboriginal Children's Health and Well-Being Measure (ACHWM). Springer Plus  
21  
22 2016;5(1):2082-7.  
23  
24
- 25 18. Maar MA, Sutherland M, McGregor L. A Regional Model for Ethical Engagement: The  
26  
27 First Nations Research Ethics Committee on Manitoulin Island  
28  
29 <http://ir.lib.uwo.ca/aprci/112>: Western University; 2007.  
30  
31
- 32  
33 19. Harris PA, Taylor R, Thielke R, Payne J, Gonzalez N, Conde JG. Research electronic data  
34  
35 capture (REDCap) - A metadata-driven methodology and workflow process for providing  
36  
37 translational research informatics support. Journal of Biomedical Informatics  
38  
39 2009;42(2):377-81.  
40  
41
- 42  
43 20. Tractenberg RE, Pietrzak RH. Intra-individual variability in Alzheimer's disease and  
44  
45 cognitive aging: definitions, context, and effect sizes. PLoS One 2011;6(4):e16973.  
46  
47
- 48 21. Young NL, Wabano M-J, Pangowish B, Trottier M, Usuba K. Validity of the Aboriginal  
49  
50 Children's Health and Well-Being Measure (Aaniish Naa Gegii) - Published Abstract from  
51  
52 the International Society for Quality of Life Annual Conference. Quality of Life Research  
53  
54 2014;23(1 Suppl):174.  
55  
56  
57  
58



- 1  
2  
3 22. Varni JW, Burwinkle TM, Seid M. The PedsQL 4.0 as a School Population Health  
4 Measure: Feasibility, Reliability, and Validity. *Quality of Life Research* 2006;15(2):203-  
5 15.  
6  
7  
8  
9  
10 23. Varni JW, Seid M, Kurtin PS. PedsQL 4.0: Reliability and Validity of the Pediatric  
11 Quality of Life Inventory Version 4.0 Generic Core Scales in Healthy and Patient  
12 Populations. *Medical Care* 2001;39(8):800-12.  
13  
14  
15  
16  
17 24. MacMillan HL, Jamieson E, Walsh C, Boyle M, Crawford A, MacMillan A. The Health of  
18 Canada's Aboriginal Children: Results from the First Nations and Inuit Regional Health  
19 Survey. *International Journal of Circumpolar Health* 2010;69(2):158-67.  
20  
21  
22  
23  
24  
25  
26  
27  
28  
29  
30  
31  
32  
33  
34  
35  
36  
37  
38  
39  
40  
41  
42  
43  
44  
45  
46  
47  
48  
49  
50  
51  
52  
53  
54  
55  
56  
57  
58  
59  
60

1  
2  
3  
4  
5  
6  
7  
8  
9  
10  
11  
12  
13  
14  
15  
16  
17  
18  
19  
20  
21  
22  
23  
24  
25  
26  
27  
28  
29  
30  
31  
32  
33  
34  
35  
36  
37  
38  
39  
40  
41  
42  
43  
44  
45  
46  
47  
48  
49  
50  
51  
52  
53  
54  
55  
56  
57  
58  
59  
60

**Figure 1: Location of participating communities**

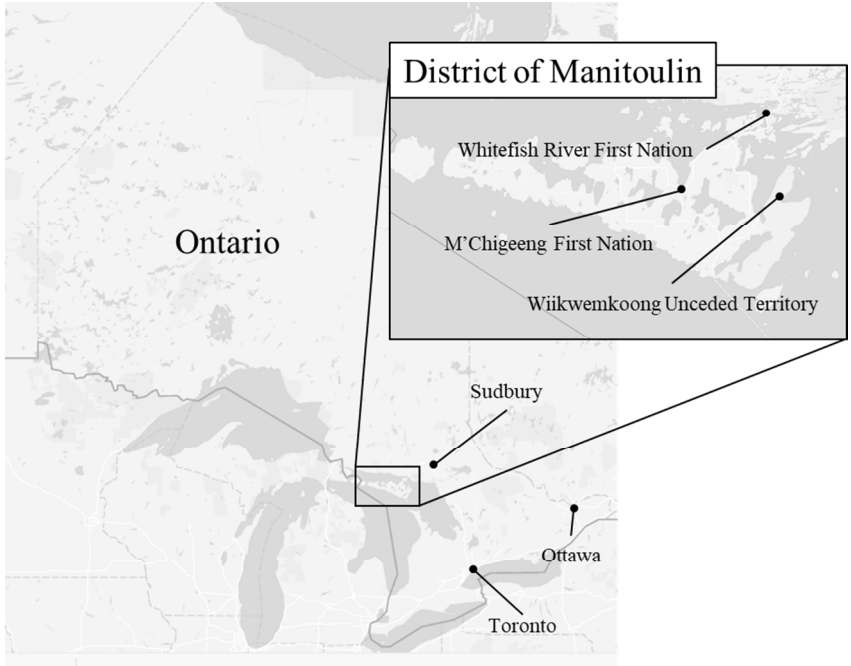

Confidential

**Figure 2: ACHWM Summary Score Distribution**

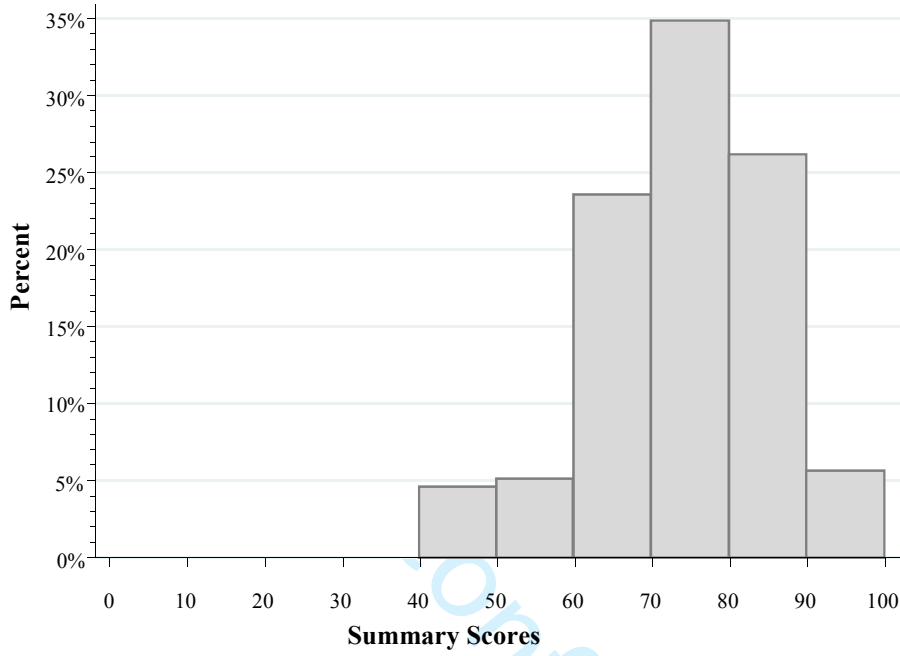

Figure 3: Distribution of ACHWM Summary Score and Quadrant Scores

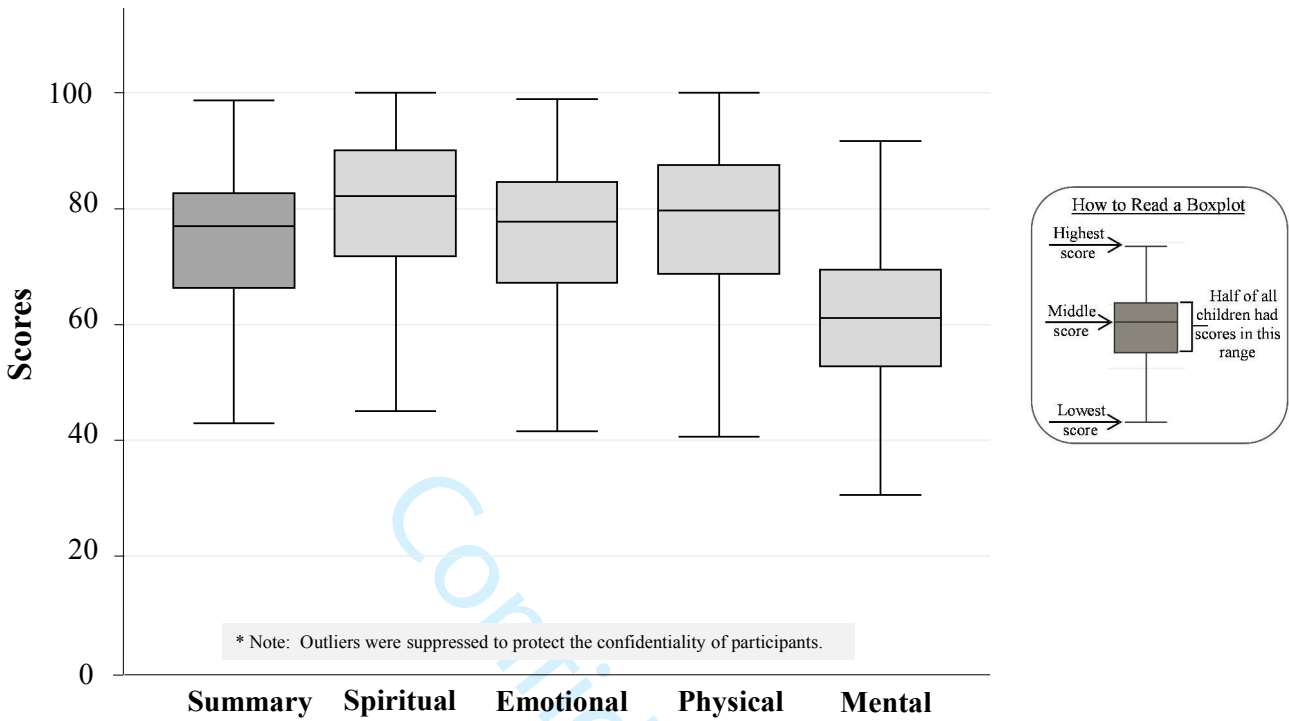

**Figure 4: Distribution of Balance Scores (SD of quadrant scores within-person)**

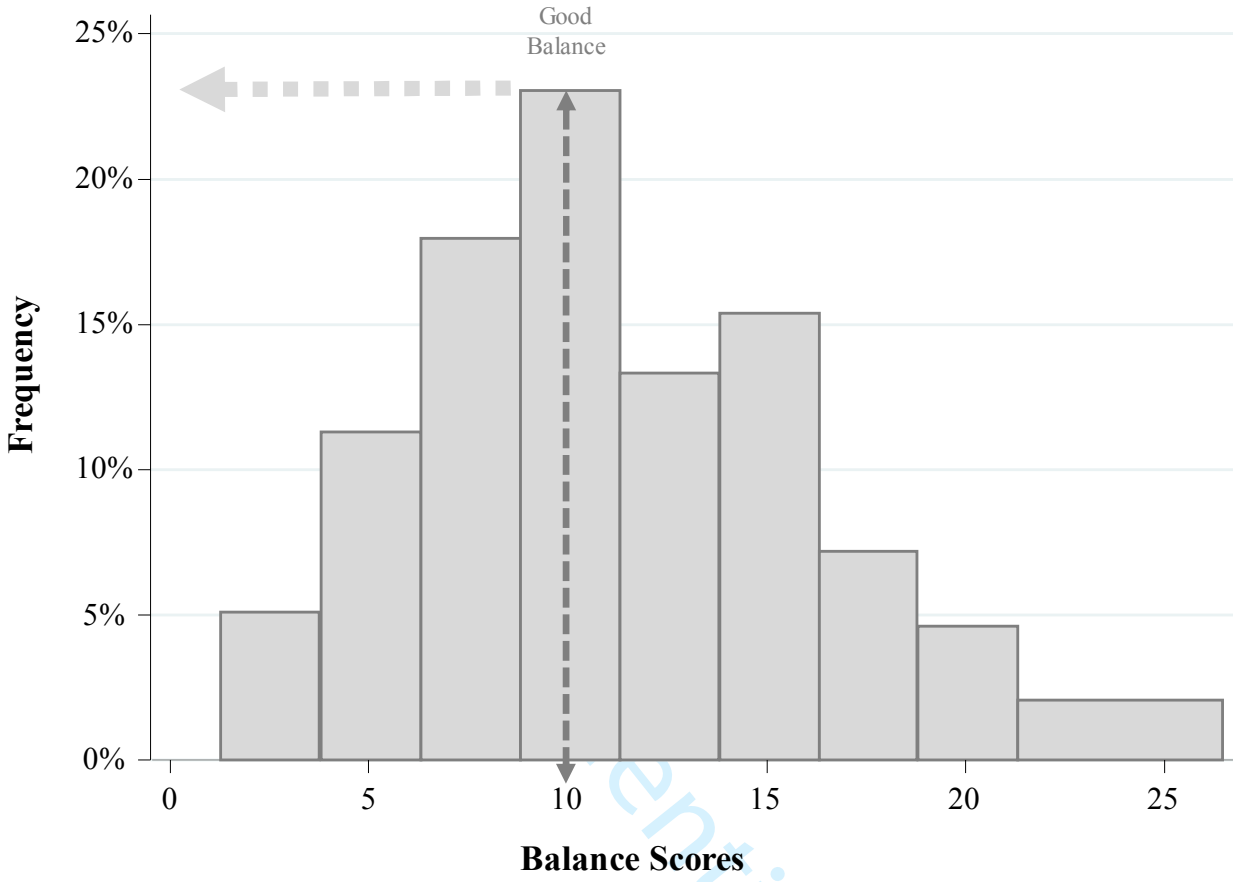

STROBE Statement—Checklist of items that should be included in reports of *cross-sectional studies*

|                              | Item No | Recommendation                                                                                                                                                                                                                                                                                                                                                                                                |
|------------------------------|---------|---------------------------------------------------------------------------------------------------------------------------------------------------------------------------------------------------------------------------------------------------------------------------------------------------------------------------------------------------------------------------------------------------------------|
| <b>Title and abstract</b>    | ✓1      | (a) Indicate the study's design with a commonly used term in the title or the abstract<br>(b) Provide in the abstract an informative and balanced summary of what was done and what was found                                                                                                                                                                                                                 |
| <b>Introduction</b>          |         |                                                                                                                                                                                                                                                                                                                                                                                                               |
| Background/rationale         | ✓2      | Explain the scientific background and rationale for the investigation being reported                                                                                                                                                                                                                                                                                                                          |
| Objectives                   | ✓3      | State specific objectives, including any prespecified hypotheses                                                                                                                                                                                                                                                                                                                                              |
| <b>Methods</b>               |         |                                                                                                                                                                                                                                                                                                                                                                                                               |
| Study design                 | ✓4      | Present key elements of study design early in the paper                                                                                                                                                                                                                                                                                                                                                       |
| Setting                      | ✓5      | Describe the setting, locations, and relevant dates, including periods of recruitment, exposure, follow-up, and data collection                                                                                                                                                                                                                                                                               |
| Participants                 | ✓6      | (a) Give the eligibility criteria, and the sources and methods of selection of participants                                                                                                                                                                                                                                                                                                                   |
| Variables                    | ✓7      | Clearly define all outcomes, exposures, predictors, potential confounders, and effect modifiers. Give diagnostic criteria, if applicable                                                                                                                                                                                                                                                                      |
| Data sources/<br>measurement | ✓8*     | For each variable of interest, give sources of data and details of methods of assessment (measurement). Describe comparability of assessment methods if there is more than one group                                                                                                                                                                                                                          |
| Bias                         | ✓9      | Describe any efforts to address potential sources of bias                                                                                                                                                                                                                                                                                                                                                     |
| Study size                   | ✓10     | Explain how the study size was arrived at                                                                                                                                                                                                                                                                                                                                                                     |
| Quantitative variables       | ✓11     | Explain how quantitative variables were handled in the analyses. If applicable, describe which groupings were chosen and why                                                                                                                                                                                                                                                                                  |
| Statistical methods          | ✓12     | (a) Describe all statistical methods, including those used to control for confounding<br>(b) Describe any methods used to examine subgroups and interactions<br>(c) Explain how missing data were addressed<br>(d) If applicable, describe analytical methods taking account of sampling strategy<br>(e) Describe any sensitivity analyses                                                                    |
| <b>Results</b>               |         |                                                                                                                                                                                                                                                                                                                                                                                                               |
| Participants                 | ✓13*    | (a) Report numbers of individuals at each stage of study—eg numbers potentially eligible, examined for eligibility, confirmed eligible, included in the study, completing follow-up, and analysed<br>(b) Give reasons for non-participation at each stage<br>(c) Consider use of a flow diagram                                                                                                               |
| Descriptive data             | ✓14*    | (a) Give characteristics of study participants (eg demographic, clinical, social) and information on exposures and potential confounders<br>(b) Indicate number of participants with missing data for each variable of interest                                                                                                                                                                               |
| Outcome data                 | ✓15*    | Report numbers of outcome events or summary measures <b>NA</b>                                                                                                                                                                                                                                                                                                                                                |
| Main results                 | ✓16     | (a) Give unadjusted estimates and, if applicable, confounder-adjusted estimates and their precision (eg, 95% confidence interval). Make clear which confounders were adjusted for and why they were included<br>(b) Report category boundaries when continuous variables were categorized<br>(c) If relevant, consider translating estimates of relative risk into absolute risk for a meaningful time period |
| Other analyses               | ✓17     | Report other analyses done—eg analyses of subgroups and interactions, and sensitivity analyses                                                                                                                                                                                                                                                                                                                |

|                          |    |                                                                                                                                                                            |
|--------------------------|----|----------------------------------------------------------------------------------------------------------------------------------------------------------------------------|
| <b>Discussion</b>        |    |                                                                                                                                                                            |
| Key results              | 18 | Summarise key results with reference to study objectives                                                                                                                   |
| Limitations              | 19 | Discuss limitations of the study, taking into account sources of potential bias or imprecision. Discuss both direction and magnitude of any potential bias                 |
| Interpretation           | 20 | Give a cautious overall interpretation of results considering objectives, limitations, multiplicity of analyses, results from similar studies, and other relevant evidence |
| Generalisability         | 21 | Discuss the generalisability (external validity) of the study results                                                                                                      |
| <b>Other information</b> |    |                                                                                                                                                                            |
| Funding                  | 22 | Give the source of funding and the role of the funders for the present study and, if applicable, for the original study on which the present article is based              |

\*Give information separately for exposed and unexposed groups.

**Note:** An Explanation and Elaboration article discusses each checklist item and gives methodological background and published examples of transparent reporting. The STROBE checklist is best used in conjunction with this article (freely available on the Web sites of PLoS Medicine at <http://www.plosmedicine.org/>, Annals of Internal Medicine at <http://www.annals.org/>, and Epidemiology at <http://www.epidem.com/>). Information on the STROBE Initiative is available at [www.strobe-statement.org](http://www.strobe-statement.org).
